RETRACTION

# Retraction: How the Malaria Vector *Anopheles gambiae* Adapts to the Use of Insecticide-Treated Nets by African Populations

Mamadou Ousmane Ndiath, Catherine Mazonot, Cheikh Sokhna, Jean-François Trape

The authors of this article have requested retraction on the basis of concerns about the experimental work and the integrity of the reported data.

An institutional investigation was conducted; the enquiry did not locate the samples which underlie the analyses reported in the article and was unable to verify that the mosquito dissections had taken place. In light of the findings from the enquiry, the direction of the Institut de Recherche pour le Développement support the retraction of the article.

In light of the above concerns, the authors retract this publication.

## Reference

1. Ndiath MO, Mazonot C, Sokhna C, Trape J-F (2014) How the Malaria Vector *Anopheles gambiae* Adapts to the Use of Insecticide-Treated Nets by African Populations. PLoS ONE 9(6): e97700. doi: [10.1371/journal.pone.0097700](https://doi.org/10.1371/journal.pone.0097700) PMID: [24892677](https://pubmed.ncbi.nlm.nih.gov/24892677/)

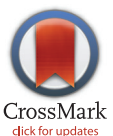

click for updates

## OPEN ACCESS

**Citation:** Ndiath MO, Mazonot C, Sokhna C, Trape J-F (2016) Retraction: How the Malaria Vector *Anopheles gambiae* Adapts to the Use of Insecticide-Treated Nets by African Populations. PLoS ONE 11(5): e0156196. doi:10.1371/journal.pone.0156196

**Published:** May 19, 2016

**Copyright:** © 2016 Ndiath et al. This is an open access article distributed under the terms of the [Creative Commons Attribution License](https://creativecommons.org/licenses/by/4.0/), which permits unrestricted use, distribution, and reproduction in any medium, provided the original author and source are credited.
